# Supplementary figures and images for: The Effect of Different Glucose Concentrations on the Antiproliferative Activity of Metformin in MCF-7 Breast Cancer Cells
Source: MDPI journal article supplement (doi:10.3390/pharmaceutics15092186), 2023-08-23

Gel 1 - Alpha-Tubulin

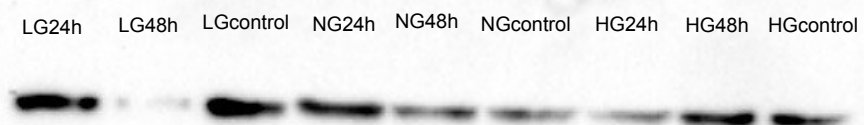

Gel 2 - BCL-2

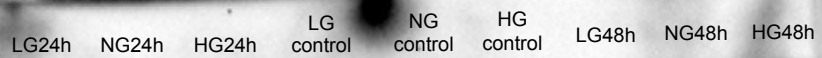

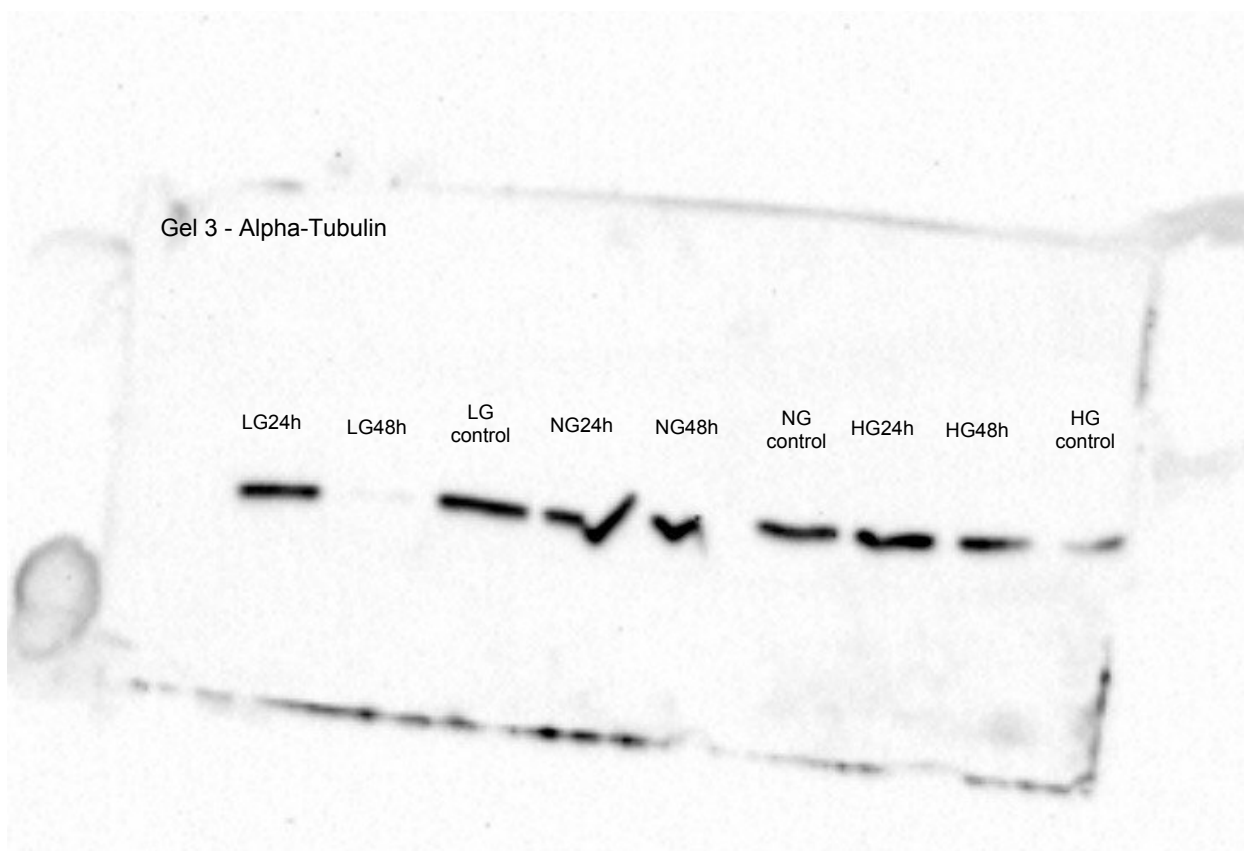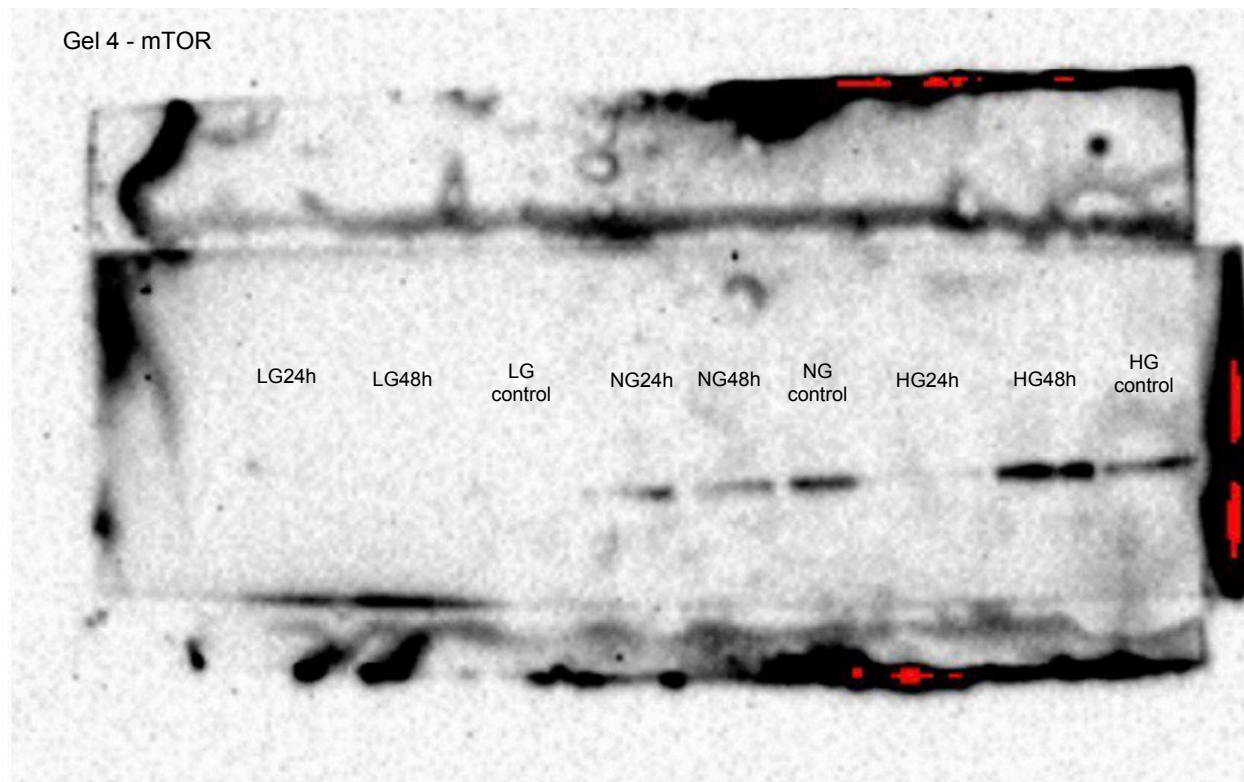

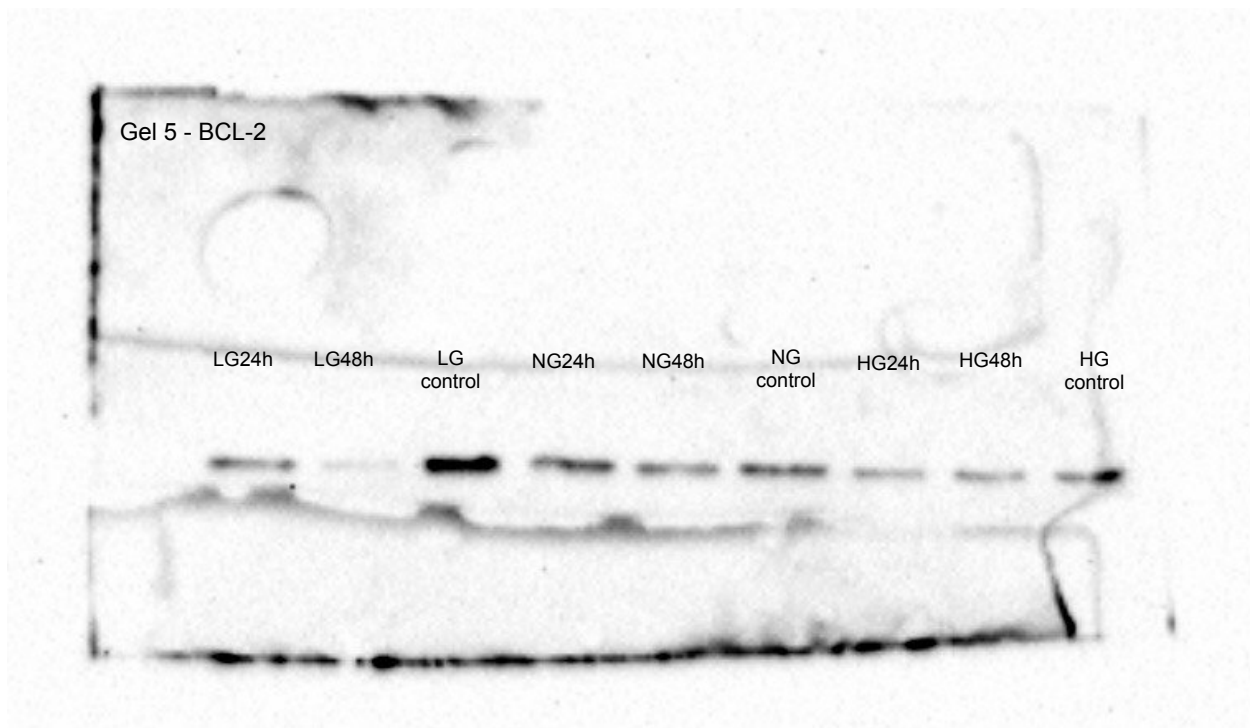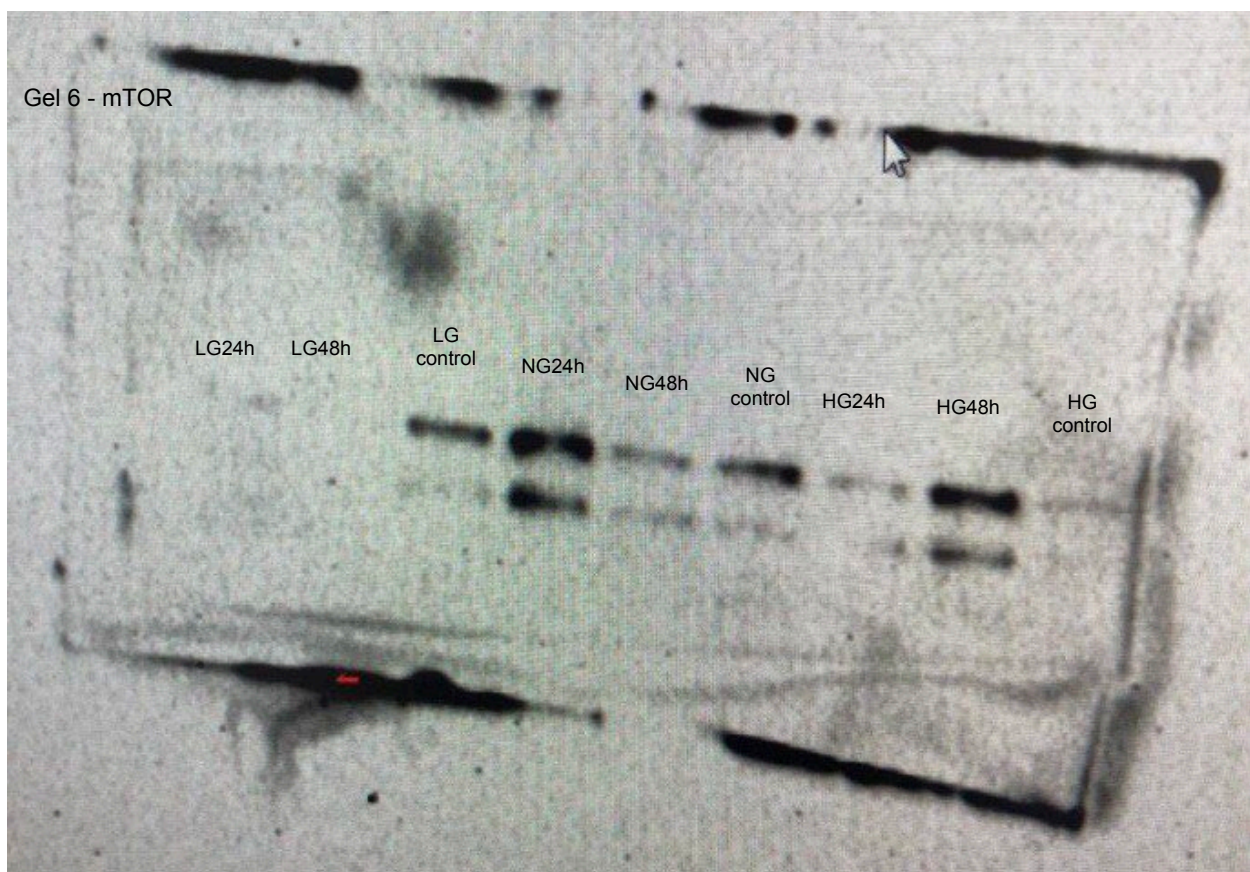

Supplement: s1 [file s1]
